# Supplementary material for: Effects of Wilting and Lactobacillus plantarum Addition on the Fermentation Quality and Microbial Community of Moringa oleifera Leaf Silage
Source: Front Microbiol. 2018 Aug 6;9:1817. doi: 10.3389/fmicb.2018.01817 (PMC6087751; doi:10.3389/fmicb.2018.01817)
Supplement: Supplementary file 1 [file Table_1.XLSX]

## Sheet: TABLE S1
TABLE S1 | Relative abundance of bacterial at the phylum level (%)
Taxonomy	Firmicutes	Proteobacteria	Bacteroidetes	Actinobacteria	others
M-1	12.9957	86.8477	0.0186955	0.137879	0
M-2	14.8808	84.8879	0.068622	0.162659	0
M-3	15.804	84.1142	0.0409057	0.0409057	0
CK1-1-60	58.1372	40.61	0.0228	0.0167	1.1631
CK2-1-60	53.0811	43.1861	0.3674	0.0184	3.3115
CK3-1-60	53.4706	45.0133	0.162	0.0101	1.2962
LP1-1-60	54.8947	42.6806	0.0729	0.143	2.1828
LP2-1-60	57.4481	40.9909	0.0296	0.0062	1.471
LP3-1-60	53.5647	45.8883	0.1005	0.0241	0.3553
CK1-2-60	53.5674	44.2136	0.1333	0.0763	1.937
CK2-2-60	52.9852	45.7508	0.062	0.0141	1.1442
CK3-2-60	53.138	44.983	0.0562	0.0476	1.7348
LP1-2-60	55.8637	43.8504	0.0154	0.0013	0.218
LP2-2-60	54.1363	44.7241	0.047	0.0027	1.0416
LP3-2-60	57.0693	41.9608	0.0247	0.0343	0.8298
CK1-1-120	54.9816	44.3904	0.0227	0.1871	0.3261
CK2-1-120	55.3795	44.264	0.0179	0.0124	0.2918
CK3-1-120	57.8804	40.768	0.2287	0.0129	1.0505
LP1-1-120	56.1167	42.4361	0.523	0.0401	0.8283
LP2-1-120	55.2554	42.8571	0.2656	0.0522	1.5272
LP3-1-120	58.9748	40.5822	0.0638	0.0056	0.2998
CK1-2-120	54.4837	45.0086	0.0328	0.0101	0.3955
CK2-2-120	55.2231	44.1899	0.0652	0.0308	0.4103
CK3-2-120	53.6423	44.2763	0.2272	0.0178	1.7596
LP1-2-120	54.5278	45.0881	0.0968	0.0368	0.1515
LP2-2-120	55.6565	43.8725	0.0711	0.0286	0.2992
LP3-2-120	54.2439	44.6667	0.0117	0.0534	0.8955
